# Supplementary material for: Manganese(iii) fluorophosphate frameworks
Source: Royal Society of Chemistry journal article supplement (doi:10.1039/c2dt31611k), 2012-11-14
Supplement: c2dt31611k.pdf [file c2dt31611k.pdf]

# Manganese(III) fluorophosphate frameworks

Jennifer A. Armstrong, Edward R. Williams and Mark T. Weller\*

Supplementary Information

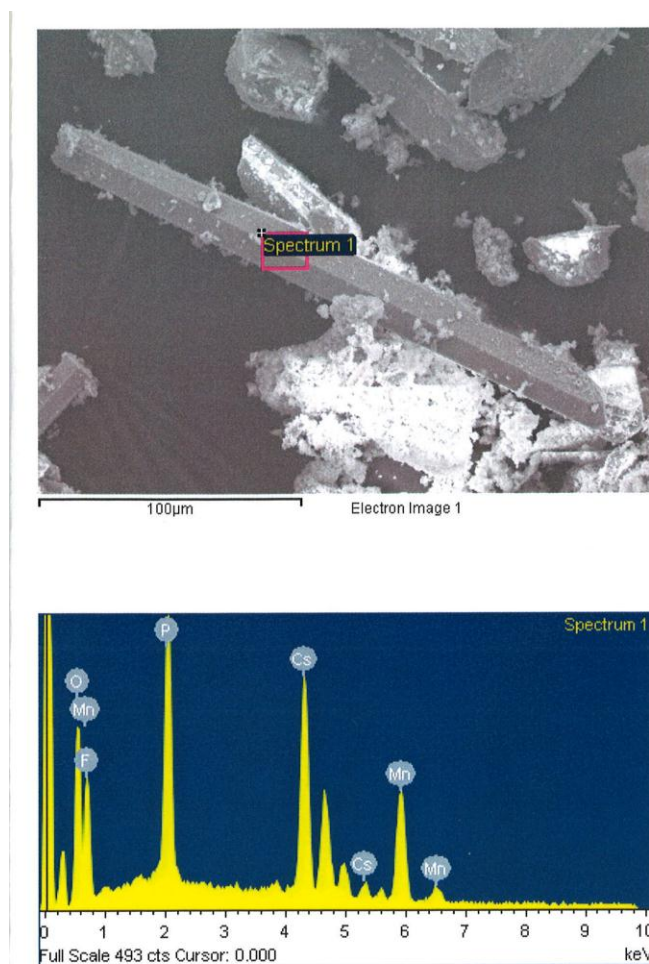

Figure 1. SEM image (top) and EDX spectrum (bottom) for  $\text{Cs}_2\text{Mn(III)}_2\text{F}_4(\text{PO}_3\text{F})_2$  (compound VII)
